# Supplementary material for: Effects of antidepressants on QT interval in people with mental disorders
Source: PubMed Central journal article supplement — Arch Med Sci. 2020 May 29;16(4):727–41. doi: 10.5114/aoms.2019.86928 (PMC7286318; doi:10.5114/aoms.2019.86928), 2020-05-29
Supplement: AMS-16-37323-s001.pdf [file AMS-16-37323-s001.pdf]

**Supplementary Table I.** Post-marketing reports of QT prolongation and torsades de pointes after antidepressants

| <b>Drug</b>                          | <b>No. of reports</b> | <b>Adverse events</b>                     | <b>Reports by gender</b> | <b>Reports by age [years]</b> |
|--------------------------------------|-----------------------|-------------------------------------------|--------------------------|-------------------------------|
| Citalopram hydrobromide <sup>7</sup> | 36                    | ECG QT corrected interval prolonged (36)  | Female (26), male (9)    | 20+ (26), < 20 (8)            |
| Citalopram hydrobromide              | 196                   | Torsades de pointes (196)                 | Female (139), male (44)  | 20+ (178), < 20 (2)           |
| Escitalopram oxalate                 | 19                    | ECG QT corrected interval prolonged (19)  | Female (14), male (4)    | 20+ (15)                      |
| Escitalopram oxalate                 | 76                    | Torsades de pointes (76)                  | Female (53), male (18)   | 20+ (66), < 20 (3)            |
| Venlafaxine hydrochloride            | 7                     | ECG QT corrected interval prolonged (7)   | Female (6), male (1)     | 20+ (6), < 20 (1)             |
| Venlafaxine hydrochloride            | 58                    | Torsades de pointes (58)                  | Female (43), male (14)   | 20+ (45), < 20 (2)            |
| Desvenlafaxine succinate             | 0                     | ECG QT corrected interval prolonged (0)   | Not reported             | Not reported                  |
| Desvenlafaxine succinate             | 2                     | Torsades de pointes (2)                   | Female (2)               |                               |
| Amitriptyline hydrochloride          | 14                    | EICG QT corrected interval prolonged (14) | Female (9), male (5)     | 20+ (12), < 20 (2)            |
| Amitriptyline hydrochloride          | 32                    | Torsades de pointes (32)                  | Female (24), male (7)    | 20+ (23), < 20 (8)            |
| Bupropion hydrochloride              | 5                     | ECG QT corrected interval prolonged (5)   | Male (4), female (1)     | 20+ (3), < 20 (1)             |
| Bupropion hydrochloride              | 9                     | Torsades de pointes (9)                   | Female (6), male (3)     | 20+ (5), < 20 (4)             |
| Duloxetine hydrochloride             | 12                    | ECG QT corrected interval prolonged (12)  | Female (8), male (4)     | 20+ (9)                       |
| Duloxetine hydrochloride             | 4                     | Torsades de pointes (4)                   | Female (4)               | 20+ (3)                       |
| Fluoxetine hydrochloride             | 28                    | ECG QT corrected interval prolonged (28)  | Female (19), male (7)    | 20+ (24), < 20 (2)            |
| Fluoxetine hydrochloride             | 107                   | Torsades de pointes (107)                 | Female (90), male (12)   | 20+ (103)                     |
| Imipramine hydrochloride             | 5                     | ECG QT corrected interval prolonged (5)   | Female (4), male (1)     | 20+ (4), < 20 (1)             |
| Imipramine hydrochloride             | 5                     | Torsades de pointes (5)                   | Female (5)               | 20+ (4)                       |
| Paroxetine hydrochloride             | 3                     | ECG QT corrected interval prolonged (3)   | Male (2)                 | < 20 (2)                      |
| Paroxetine hydrochloride             | 44                    | Torsades de pointes (44)                  | Female (31), male (9)    | 20+ (37)                      |
| Clomipramine hydrochloride           | 1                     | ECG QT corrected interval prolonged (1)   | Female (1)               | 20+ (1)                       |
| Clomipramine hydrochloride           | 4                     | Torsades de pointes (4)                   | Female (2), male (1)     | 20+ (2), < 20 (1)             |

Supplementary Table I. Cont.

| Drug                        | No. of reports | Adverse events                           | Reports by gender      | Reports by age [years] |
|-----------------------------|----------------|------------------------------------------|------------------------|------------------------|
| Dosulepin                   | No data        | ECG QT corrected interval prolonged      |                        |                        |
| Dosulepin                   | No data        | Torsades de pointes                      |                        |                        |
| Fluvoxamine maleate         | 9              | ECG QT corrected interval prolonged (9)  | Male (5), female (4)   | 20+ (6), < 20 (3)      |
| Fluvoxamine maleate         | 16             | Torsades de pointes (16)                 | Female (12), male (4)  | 20+ (16)               |
| Mirtazapine                 | 13             | ECG QT corrected interval prolonged (13) | Female (11), male (2)  | 20+ (13)               |
| Mirtazapine                 | 29             | Torsades de pointes (29)                 | Female (19), male (9)  | 20+ (27)               |
| Nortriptyline hydrochloride | 2              | ECG QT corrected interval prolonged (2)  | Female (1), male (1)   | 20+ (2)                |
| Setraline hydrochloride     | 13             | ECG QT corrected interval prolonged (13) | Female (8), male (5)   | 20+ (7), < 20 (3)      |
| Sertraline hydrochloride    | 48             | Torsades de pointes (48)                 | Female (23), male (16) | 20+ (42), < 20 (3)     |
| Trazodone hydrochloride     | 1              | ECG QT corrected interval prolonged (1)  | Female (1)             | 20+ (1)                |
| Trazodone hydrochloride     | 20             | Torsades de pointes (20)                 | Female (16), male (3)  | 20+ (18)               |
| Selegiline hydrochloride    | 1              | Torsades de pointes (1)                  | Female (1)             | 20+ (1)                |
| Maprotiline hydrochloride   | 3              | Torsades de pointes (3)                  | Female (2)             | 20+ (2)                |
| Nefazodone hydrochloride    | 6              | Torsades de pointes (6)                  | Female (6)             | 20+ (6)                |
| Amoxapine                   | 2              | Torsades de pointes (2)                  | Female (2)             | 20+ (2)                |

From <https://www.pharmapendium.com>.

**Supplementary Table II.** Observational studies that examined the association between citalopram with QT prolongation and related clinical outcomes

| Active                             | Control                  | Outcome                                         | Relative measure of association        | Patients (studies)                         | Comment <sup>†</sup>     |
|------------------------------------|--------------------------|-------------------------------------------------|----------------------------------------|--------------------------------------------|--------------------------|
| Citalopram > 40 mg                 | Citalopram, 1–20 mg      | Ventricular arrhythmias                         | Adjusted HR = 0.68 (0.61–0.76)         | 618,450 (1 observational study) [92]       | Favors higher dose       |
| Citalopram > 40 mg                 | Citalopram, 1–20 mg      | All-cause mortality                             | Adjusted HR = 0.94 (0.90–0.99)         | 618,450 (1 observational study) [92]       | Favors higher dose       |
| Citalopram > 40 mg                 | Sertraline, high dose    | Ventricular arrhythmias                         | RR = 0.77 (0.68–0.88)                  | 245,787 (1 observational study) [92]       | Favors citalopram        |
| Citalopram > 40 mg                 | Sertraline, high dose    | All-cause mortality                             | RR = 0.71 (0.68–0.75)                  | 245,787 (1 observational study) [92]       | Favors citalopram        |
| Citalopram dose reduce < 40 mg/day | Citalopram > 40 mg/day   | All-cause deaths or hospitalizations            | Adjusted HR = 4.50 (4.10–5.00)         | 35,848 (1 observational study) [109]       | Favors higher dose       |
| Citalopram dose reduce < 40 mg/day | Citalopram > 40 mg/day   | All-cause deaths or arrhythmia hospitalizations | Adjusted HR = 1.30 (1.00–1.70)         | 35,848 (1 observational study) [109]       | Favors higher dose       |
| Citalopram, 20 mg                  | Citalopram, 10 mg        | QT prolongation                                 | Adjusted MD = 9.80 (6.66–12.94)        | 38,397 (1 observational study) [86]        | Favors lower dose        |
| Citalopram, 30 mg                  | Citalopram, 20 mg        | QT prolongation                                 | Adjusted MD = –0.90 (–6.19 – 4.39)     | 38,397 (1 observational study) [86]        | No difference            |
| Citalopram, 40 mg                  | Citalopram, 30 mg        | QT prolongation                                 | Adjusted MD = –0.70 (–6.19 – 4.79)     | 38,397 (1 observational study) [86]        | No difference            |
| <b>Citalopram, 60 mg</b>           | <b>Citalopram, 40 mg</b> | <b>QT prolongation</b>                          | <b>Adjusted MD = 6.10 (1.98–10.22)</b> | <b>38,397 (1 observational study) [86]</b> | <b>Favors lower dose</b> |

**Boldface indicates statistically significant differences at 95% CI. †We concluded that there is no difference in outcomes between active and control interventions based on p-value > 0.05 and inability to reject null hypotheses but without post hoc analysis of the statistical power to detect true differences.**

**Supplementary Table III.** GRADE summary of findings: effect of fluoxetine on QT interval in adults with mental disorders

| Outcome                                      | Risk with intervention per 1000 | Risk with comparator per 1000 | Relative measure of association | No. of participants (studies)     | Quality (GRADE) | Comments <sup>†</sup> |
|----------------------------------------------|---------------------------------|-------------------------------|---------------------------------|-----------------------------------|-----------------|-----------------------|
| QT prolonged, fluoxetine, 20 mg              | 6                               | 4                             | RR = 1.54 (0.10–24.48)          | 427 (1 RCT) [114]                 | Very low        | No difference         |
| QT prolonged, fluoxetine, 40 mg              | 0                               | 4                             | RR = 1.03 (0.04–25.09)          | 342 (1 RCT) [114]                 | Very low        | No difference         |
| QTC, ms                                      | NR                              | NR                            | MD = 0.00 (–0.61 – 0.61)        | 54 (1 RCT) [46, 94]               | Very low        | No difference         |
| Sudden death, with cardiovascular disease    | NR                              | NR                            | Adjusted OR = 2.26 (0.96–5.34)  | 4040 (1 observational study) [76] | Low             | No difference         |
| Sudden death, without cardiovascular disease | NR                              | NR                            | Adjusted OR = 2.44 (0.77–7.74)  | 4040 (1 observational study) [76] | Low             | No difference         |

**Population: people with mental disorders; Settings: any; Intervention: fluoxetine; Comparator: placebo or no active drug. †We concluded that there is no difference in outcomes between active and control interventions based on p-value > 0.05 and inability to reject null hypotheses but without post hoc analysis of the statistical power to detect true differences.**

Supplementary Table IV. GRADE summary of findings: effect of paroxetine on QT interval in adults with mental disorders

| Outcome                                      | Risk with intervention per 1000 | Risk with comparator per 1000 | Relative measure of association                         | No. of participants (studies)     | Quality (GRADE) | Comments <sup>a</sup> |
|----------------------------------------------|---------------------------------|-------------------------------|---------------------------------------------------------|-----------------------------------|-----------------|-----------------------|
| QT [ms]                                      | NR                              | NR                            | MD = 6.80 (-3.96 – 17.56)                               | 878 (6 RCTs) [39, 59, 69, 94]     | Moderate        | No difference         |
| QTcB [ms]                                    | NR                              | NR                            | MD = 2.42 (-3.92 – 8.76),<br>SMD = 0.13 (-0.22 – 0.48)  | 128 (1 RCT) [59]                  | Very low        | No difference         |
| QTcF [ms]                                    | NR                              | NR                            | MD = 3.93 (-2.56 – 10.42),<br>SMD = 0.21 (-0.14 – 0.56) | 128 (1 RCT) [59]                  | Very low        | No difference         |
| QT [ms]                                      | 3                               | 0                             | RR = 3.00 (0.12–73.33)                                  | 698 (2 RCTs) [59, 101]            | Low             | No difference         |
| Sudden death, with cardiovascular disease    | NR                              | NR                            | Adjusted OR = 1.42 (0.53–3.83)                          | 4040 (1 observational study) [76] | Low             | No difference         |
| Sudden death, without cardiovascular disease | NR                              | NR                            | Adjusted OR = 0.20 (0.02–2.01)                          | 4040 (1 observational study) [76] | Low             | No difference         |

Population: adults with mental disorders; Settings: any; Intervention: paroxetine; Comparator: placebo or no active drug. <sup>a</sup>We concluded that there is no difference in outcomes between active and control interventions based on *p*-value > 0.05 and inability to reject null hypotheses but without post hoc analysis of the statistical power to detect true differences.

Supplementary Table V. GRADE summary of findings: effect of paroxetine on QT interval in children with mental disorders

| Outcome                                      | Risk with intervention per 1000 | Risk with comparator per 1000                                 | Relative measure of association                          | No. of participants (studies) | Quality (GRADE) | Comments <sup>a</sup> |
|----------------------------------------------|---------------------------------|---------------------------------------------------------------|----------------------------------------------------------|-------------------------------|-----------------|-----------------------|
| Paroxetine vs. placebo:                      |                                 |                                                               |                                                          |                               |                 |                       |
| QT interval                                  | NR                              | NR                                                            | MD = -4.40 (-9.46 – 0.66),<br>SMD = -0.17 (-0.36 – 0.03) | 407 (1 RCT) [68]              | Very low        | No difference         |
| QTcB interval [ms]                           | NR                              | NR                                                            | MD = 0.70 (-3.59 – 4.99),<br>SMD = 0.03 (-0.16 – 0.23)   | 407 (1 RCT) [68]              | Very low        | No difference         |
| QTcF interval [ms]                           | NR                              | NR                                                            | MD = -1.20 (-4.85 – 2.45),<br>SMD = -0.06 (-0.26 – 0.13) | 407 (1 RCT) [68]              | Very low        | No difference         |
| Maximum QTcB change from screening, 30–60 ms | 50                              | 116 attributable avoided events per 1000 treated, 66 (13–119) | RR = 0.43 (0.21–0.88),<br>NNTp = 15 (8–78)               | 407 (1 RCT) [68]              | Very low        | Favors paroxetine     |
| Maximum QTcB change from screening, > 60 ms  | 10                              | 14                                                            | RR = 0.69 (0.12–4.09)                                    | 407 (1 RCT) [68]              | Very low        | No difference         |
| Maximum QTcF change from screening, 30–60 ms | 25                              | 116 attributable avoided events per 1000 treated, 91 (42–140) | RR = 0.22 (0.08–0.55),<br>NNTp = 11 (7–24)               | 407 (1 RCT) [68]              | Very low        | Favors paroxetine     |
| Maximum QTcF change from screening, > 60 ms  | 0                               | 14                                                            | RR = 0.15 (0.01–2.84)                                    | 407 (1 RCT) [68]              | Very low        | No difference         |

Supplementary Table V. Cont.

| Outcome                                             | Risk with intervention per 1000 | Risk with comparator per 1000                                         | Relative measure of association                                            | No. of participants (studies) | Quality (GRADE) | Comments†                |
|-----------------------------------------------------|---------------------------------|-----------------------------------------------------------------------|----------------------------------------------------------------------------|-------------------------------|-----------------|--------------------------|
| Absolute QTcB interval, > 440 ms                    | 15                              | 19                                                                    | RR = 0.78 (0.18–3.42)                                                      | 407 (1 RCT) [68]              | Very low        | No difference            |
| Absolute QTcB interval, > 450 ms                    | 10                              | 14                                                                    | RR = 0.69 (0.12–4.09)                                                      | 407 (1 RCT) [68]              | Very low        | No difference            |
| Absolute QTcB interval, > 480 ms                    | 0                               | 0                                                                     | RR inestimable                                                             | 407 (1 RCT) [68]              | Very low        | No difference            |
| Absolute QTcB interval, > 500 ms                    | 0                               | 0                                                                     | RR inestimable                                                             | 407 (1 RCT) [68]              | Very low        | No difference            |
| Absolute QTcF interval, > 440 ms                    | 10                              | 5                                                                     | RR = 2.07 (0.19–22.65)                                                     | 407 (1 RCT) [68]              | Very low        | No difference            |
| Absolute QTcF interval, > 450 ms                    | 5                               | 5                                                                     | RR = 1.04 (0.07–16.43)                                                     | 407 (1 RCT) [68]              | Very low        | No difference            |
| Absolute QTcF interval, > 480 ms                    | 0                               | 0                                                                     | RR inestimable                                                             | 407 (1 RCT) [68]              | Very low        | No difference            |
| Absolute QTcF interval, > 500 ms                    | 0                               | 0                                                                     | RR inestimable                                                             | 407 (1 RCT) [68]              | Very low        | No difference            |
| Paroxetine vs. imipramine:                          |                                 |                                                                       |                                                                            |                               |                 |                          |
| <b>QTcB interval [ms]</b>                           | <b>NR</b>                       | <b>NR</b>                                                             | <b>MD = -19.00 (-24.90 – -13.10)</b><br><b>SMD = -0.94 (-1.28 – -0.59)</b> | <b>242 (1 RCT) [68]</b>       | <b>Very low</b> | <b>Favors paroxetine</b> |
| <b>QTcF interval, ms</b>                            | <b>NR</b>                       | <b>NR</b>                                                             | <b>MD = -5.90 (-10.95 – -0.85)</b><br><b>SMD = -0.33 (-0.66 – 0.01)</b>    | <b>242 (1 RCT) [68]</b>       | <b>Very low</b> | <b>Favors paroxetine</b> |
| Maximum QTcB change from screening, 30–60 ms        | 238                             | 381                                                                   | RR = 0.63 (0.32–1.21)                                                      | 84 (1 RCT) [68]               | Very low        | No difference            |
| Maximum QTcB change from screening, > 60 ms         | 48                              | 119                                                                   | RR = 0.40 (0.08–1.95)                                                      | 84 (1 RCT) [68]               | Very low        | No difference            |
| <b>Maximum QTcF change from screening, 30–60 ms</b> | <b>25</b>                       | <b>95</b>                                                             | <b>RR = 0.26 (0.07–0.94)</b>                                               | <b>242 (1 RCT) [68]</b>       | <b>Very low</b> | <b>Favors paroxetine</b> |
| Maximum QTcF change from screening, > 60 ms         | 0                               | 24                                                                    | RR = 0.07 (0.00–1.72)                                                      | 242 (1 RCT) [68]              | Very low        | No difference            |
| <b>Absolute QTcB interval, &gt; 440 ms</b>          | <b>15</b>                       | <b>190 attributable avoided events per 1000 treated, 175 (56–295)</b> | <b>RR = 0.08 (0.02–0.28), NNTp = 6 (3–18)</b>                              | <b>242 (1 RCT) [68]</b>       | <b>Very low</b> | <b>Favors paroxetine</b> |
| Absolute QTcB interval, > 450 ms                    | 10                              | 48                                                                    | RR = 0.21 (0.03–1.45)                                                      | 242 (1 RCT) [68]              | Very low        | No difference            |
| Absolute QTcB interval, > 480 ms                    | 0                               | 24                                                                    | RR = 0.07 (0.00–1.72)                                                      | 242 (1 RCT) [68]              | Very low        | No difference            |
| Absolute QTcB interval, > 500 ms                    | 0                               | 0                                                                     | RR inestimable                                                             | 242 (1 RCT) [68]              | Very low        | No difference            |
| Absolute QTcF interval, > 440 ms                    | 10                              | 24                                                                    | RR = 0.42 (0.04–4.53)                                                      | 242 (1 RCT) [68]              | Very low        | No difference            |
| Absolute QTcF interval, > 450 ms                    | 5                               | 0                                                                     | RR = 0.64 (0.03–15.49)                                                     | 242 (1 RCT) [68]              | Very low        | No difference            |
| Absolute QTcF interval, > 480 ms                    | 0                               | 0                                                                     | RR inestimable                                                             | 242 (1 RCT) [68]              | Very low        | No difference            |
| Absolute QTcF interval, > 500 ms                    | 0                               | 0                                                                     | RR inestimable                                                             | 242 (1 RCT) [68]              | Very low        | No difference            |

Population: children with mental disorders; Settings: any; Intervention: paroxetine; Comparator: placebo or no active drug. **Boldface** indicates statistically significant differences at 95% CI. †We concluded that there is no difference in outcomes between active and control interventions based on p-value > 0.05 and inability to reject null hypotheses but without post hoc analysis of the statistical power to detect true differences.

Supplementary Table VI. GRADE Summary of findings: effect of bupropion on QT interval in adults with mental disorders

| Outcome                                           | Risk with intervention per 1000 | Risk with comparator per 1000 | Relative measure of association    | No. of participants (studies)       | Quality (GRADE) | Comments <sup>†</sup> |
|---------------------------------------------------|---------------------------------|-------------------------------|------------------------------------|-------------------------------------|-----------------|-----------------------|
| QT prolongation, bupropion vs. no antidepressants | NR                              | NR                            | Adjusted MD = -0.02 (-0.04 – 0.00) | 38,397 (1 observational study) [86] | Low             | No difference         |
| QT prolongation, bupropion 100 mg vs. 75 mg       | NR                              | NR                            | Adjusted MD = 0.00 (-4.12 – 4.12)  | 38,397 (1 observational study) [86] | Low             | No difference         |
| QT prolongation, bupropion, 150 mg vs. 100 mg     | NR                              | NR                            | Adjusted MD = -3.30 (-7.61 – 1.01) | 38,397 (1 observational study) [86] | Low             | No difference         |
| QT prolongation, bupropion, 200 mg vs. 150 mg     | NR                              | NR                            | Adjusted MD = -1.80 (-5.92 – 2.32) | 38,397 (1 observational study) [86] | Low             | No difference         |
| QT prolongation, bupropion, 300 mg vs. 200 mg     | NR                              | NR                            | Adjusted MD -0.30 (-5.20 – 4.60)   | 38,397 (1 observational study) [86] | Low             | No difference         |

Population: people with mental disorders; Settings: any; Intervention: bupropion; Comparator: placebo or no active drug. We concluded that there is no difference in outcomes between active and control interventions based on  $p$ -value > 0.05 and inability to reject null hypotheses but without post hoc analysis of the statistical power to detect true differences.

Supplementary Table VII. GRADE summary of findings: effect of duloxetine on QT interval in adults with mental disorders

| Outcome                                            | Risk with intervention per 1000 | Risk with comparator per 1000 | Relative measure of association                           | No. of participants (studies) | Quality (GRADE) | Comments <sup>†</sup> |
|----------------------------------------------------|---------------------------------|-------------------------------|-----------------------------------------------------------|-------------------------------|-----------------|-----------------------|
| QTc value of > 500 ms 6 months, duloxetine, 80 mg  | 0                               | 0                             | RR inestimable                                            | 128 (1 RCT) [59]              | Very low        | No difference         |
| QTc value of > 500 ms 6 months, duloxetine, 120 mg | 0                               | 0                             | RR inestimable                                            | 132 (1 RCT) [59]              | Very low        | No difference         |
| QT (ms) 2 months, duloxetine, 80 mg                | NR                              | NR                            | MD = -0.27 (-0.56 – 0.02),<br>SMD = -6.71 (-13.76 – 0.34) | 186 (1 RCT) [59]              | Very low        | No difference         |
| QTcB (ms) 2 months, duloxetine, 80 mg              | NR                              | NR                            | MD = -0.06 (-0.34 – 0.23),<br>SMD -0.88 (-5.45 – 3.69)    | 186 (1 RCT) [59]              | Very low        | No difference         |
| QTcF (ms) 2 months, duloxetine, 80 mg              | NR                              | NR                            | MD = -0.20 (-0.49 – 0.08),<br>SMD = -2.91 (-7.00 – 1.18)  | 186 (1 RCT) [59]              | Very low        | No difference         |
| QT (ms) 2 months, duloxetine, 120 mg               | NR                              | NR                            | MD = -0.28 (-0.57 – 0.01),<br>SMD = -7.45 (-15.11 – 0.21) | 186 (1 RCT) [59]              | Very low        | No difference         |
| QTcB (ms) 2 months, duloxetine, 120 mg             | NR                              | NR                            | MD = 0.12 (-0.17 – 0.41),<br>SMD = 2.48 (-3.57 – 8.53)    | 186 (1 RCT) [59]              | Very low        | No difference         |
| QTcF (ms) 2 months, duloxetine, 120 mg             | NR                              | NR                            | MD = -0.05 (-0.34 – 0.24),<br>SMD = -0.97 (-6.55 – 4.61)  | 186 (1 RCT) [59]              | Very low        | No difference         |
| QT (ms) 6 months, duloxetine, 80 mg                | NR                              | NR                            | MD = -0.02 (-0.37 – 0.33),<br>SMD = -0.63 (-10.58 – 9.32) | 128 (1 RCT) [59]              | Very low        | No difference         |

Supplementary Table VII. Cont.

| Outcome                                | Risk with intervention per 1000 | Risk with comparator per 1000 | Relative measure of association                           | No. of participants (studies)          | Quality (GRADE) | Comments <sup>†</sup> |
|----------------------------------------|---------------------------------|-------------------------------|-----------------------------------------------------------|----------------------------------------|-----------------|-----------------------|
| QTcB (ms) 6 months, duloxetine, 80 mg  | NR                              | NR                            | MD = 0.24 (-0.11 – 0.59),<br>SMD = 4.36 (-1.86 – 10.58)   | 128 (1 RCT) [59]                       | Very low        | No difference         |
| QTcF (ms) 6 months, duloxetine, 80 mg  | NR                              | NR                            | MD = 0.15 (-0.20 – 0.50),<br>SMD = 2.54 (-3.46 – 8.54)    | 128 (1 RCT) [59]                       | Very low        | No difference         |
| QT (ms) 6 months, duloxetine, 120 mg   | NR                              | NR                            | MD = -0.03 (-0.38 – 0.31),<br>SMD = -0.92 (-10.78 – 8.94) | 132 (1 RCT) [59]                       | Very low        | No difference         |
| QTcB (ms) 6 months, duloxetine, 120 mg | NR                              | NR                            | MD = 0.04 (-0.31 – 0.38),<br>SMD = 0.58 (-4.95 – 6.11)    | 132 (1 RCT) [59]                       | Very low        | No difference         |
| QT prolongation                        | NR                              | NR                            | Adjusted MD = 0.02 (-0.08 – 0.12)                         | 38,397<br>(1 observational study) [86] | Low             | No difference         |

Population: people with mental disorders; Settings: any; Intervention: duloxetine; Comparator: placebo or no active drug. <sup>†</sup>We concluded that there is no difference in outcomes between active and control interventions based on p-value > 0.05 and inability to reject null hypotheses but without post hoc analysis of the statistical power to detect true differences.

Supplementary Table VIII. GRADE summary of findings: effect of serotonin antagonist and reuptake inhibitors on QT interval in adults with mental disorders

| Outcome                                      | Risk with intervention per 1000 | Risk with comparator per 1000 | Relative measure of association | No. of participants (studies)        | Quality (GRADE) | Comments <sup>†</sup> |
|----------------------------------------------|---------------------------------|-------------------------------|---------------------------------|--------------------------------------|-----------------|-----------------------|
| Fluvoxamine:                                 |                                 |                               |                                 |                                      |                 |                       |
| QTC [ms]                                     | NR                              | NR                            | MD = -5.00 (-6.04 – -3.96)      | 27 (1 RCT) [94, 149]                 | Very low        | Favors fluvoxamine    |
| Sertraline:                                  |                                 |                               |                                 |                                      |                 |                       |
| QTC [ms]                                     | NR                              | NR                            | MD = 3.00 (2.96–3.04)           | 369 (1 RCT) [50, 94]                 | Very low        | Favors placebo        |
| Sudden death, with cardiovascular disease    | NR                              | NR                            | Adjusted OR = 2.06 (0.57–7.47)  | 4040 (1 observational study) [76]    | Low             | No difference         |
| Sudden death, without cardiovascular disease | NR                              | NR                            | Adjusted OR = 3.91 (0.62–24.62) | 4040 (1 observational study) [76]    | Low             | No difference         |
| Sertraline, high vs. low dose:               |                                 |                               |                                 |                                      |                 |                       |
| Ventricular arrhythmias                      | NR                              | NR                            | Adjusted HR = 0.70 (0.62–0.78)  | 365,898 (1 observational study) [92] | Low             | Favors higher dose    |
| All-cause mortality                          | NR                              | NR                            | Adjusted HR = 1.00 (0.96–1.04)  | 365,898 (1 observational study) [92] | Low             | No difference         |
| Trazodone:                                   |                                 |                               |                                 |                                      |                 |                       |
| QTC ≥ 450, adults with predialysis           | NR                              | NR                            | Adjusted OR = 0.80 (0.40–1.50)  | 3252 (1 observational study) [112]   | Low             | No difference         |

Population: adults with mental disorders; Settings: any; Intervention: serotonin antagonist and reuptake inhibitors; Comparator: placebo or no active drug. **Boldface** indicates statistically significant differences at 95% CI. <sup>†</sup>We concluded that there is no difference in outcomes between active and control interventions based on p-value > 0.05 and inability to reject null hypotheses but without post hoc analysis of the statistical power to detect true differences.

Supplementary Table IX. GRADE summary of findings: effect of amitriptyline on QT interval in patients with mental or neurologic disorders

| Outcome                                                                                     | Risk with intervention per 1000 | Risk with comparator per 1000 | Relative measure of association                           | No. of participants (studies)              | Quality (GRADE) | Comments <sup>†</sup>    |
|---------------------------------------------------------------------------------------------|---------------------------------|-------------------------------|-----------------------------------------------------------|--------------------------------------------|-----------------|--------------------------|
| Children with functional gastrointestinal disorders:                                        |                                 |                               |                                                           |                                            |                 |                          |
| QTc                                                                                         | NR                              | NR                            | MD = -4.60 (-11.37 - 2.17),<br>SMD = -0.28 (-0.70 - 0.13) | 90 (1 RCT) [95]                            | Very low        | No difference            |
| Adults with diabetic peripheral neuropathy treated with amitriptyline 4% ketamine 2% cream: |                                 |                               |                                                           |                                            |                 |                          |
| QT prolonged                                                                                | 0                               | 9                             | RR = 0.33 (0.01-7.96)                                     | 226 (1 RCT) [78]                           | Very low        | No difference            |
| Adults with mental disorders:                                                               |                                 |                               |                                                           |                                            |                 |                          |
| <b>QT prolongation, amitriptyline vs. no antidepressants</b>                                | <b>NR</b>                       | <b>NR</b>                     | <b>Adjusted MD = 0.11 (0.05-0.17)</b>                     | <b>38,397 (1 observational study) [86]</b> | <b>Low</b>      | <b>Favors control</b>    |
| QT prolongation, amitriptyline, 20 mg vs. 10 mg                                             | NR                              | NR                            | Adjusted MD = -0.80 (-7.27 - 5.67)                        | 38,397 (1 observational study) [86]        | Low             | No difference            |
| QT prolongation, amitriptyline, 25 mg vs. 20 mg                                             | NR                              | NR                            | Adjusted MD = 5.30 (-1.17 - 11.77)                        | 38,397 (1 observational study) [86]        | Low             | No difference            |
| <b>QT prolongation, amitriptyline, 50 mg vs. 25 mg</b>                                      | <b>NR</b>                       | <b>NR</b>                     | <b>Adjusted MD = 3.40 (0.66-6.14)</b>                     | <b>38,397 (1 observational study) [86]</b> | <b>Low</b>      | <b>Favors lower dose</b> |
| QT prolongation, amitriptyline, 75 mg vs. 50 mg                                             | NR                              | NR                            | Adjusted MD = -2.00 (-8.47 - 4.47)                        | 38,397 (1 observational study) [86]        | Low             | No difference            |
| QT prolongation, amitriptyline, 100 mg vs. 75 mg                                            | NR                              | NR                            | Adjusted MD = 1.90 (-6.14 - 9.94)                         | 38,397 (1 observational study) [86]        | Low             | No difference            |
| QTc ≥ 450, adults with predialysis CKD                                                      | NR                              | NR                            | Adjusted OR = 1.30 (0.80-2.20)                            | 3252 (1 observational study) [112]         | Low             | No difference            |
| Sudden death, with cardiovascular disease                                                   | NR                              | NR                            | Adjusted OR = 1.07 (0.48-2.40)                            | 4040 (1 observational study) [76]          | Low             | No difference            |
| Sudden death, without cardiovascular disease                                                | NR                              | NR                            | Adjusted OR = 1.34 (0.54-3.43)                            | 4040 (1 observational study) [76]          | Low             | No difference            |

Population: people with mental or neurologic disorders ; settings: Any; intervention: amitriptyline; Comparator: placebo or no active drug. **Boldface** indicates statistically significant differences at 95% CI. <sup>†</sup>We concluded that there is no difference in outcomes between active and control interventions based on p-value > 0.05 and inability to reject null hypotheses but without post hoc analysis of the statistical power to detect true differences.



Supplementary Table X. GRADE summary of findings: effect of imipramine on QT interval in children with mental disorders

| Outcome                                      | Risk with intervention per 1000 | Risk with comparator per 1000                                | Relative measure of association                         | No. of participants (studies) | Quality (GRADE) | Comments <sup>†</sup> |
|----------------------------------------------|---------------------------------|--------------------------------------------------------------|---------------------------------------------------------|-------------------------------|-----------------|-----------------------|
| QTcB interval [ms]                           | NR                              | NR                                                           | <b>MD = 19.70 (13.66–25.74), SMD = 0.88 (0.54–1.22)</b> | <b>249 (1 RCT) [68]</b>       | <b>Very low</b> | <b>Favors placebo</b> |
| QTcF interval [ms]                           | NR                              | NR                                                           | MD = 4.70 (–0.33 – 9.73), SMD = 0.26 (–0.07 – 0.59)     | 249 (1 RCT) [68]              | Very low        | No difference         |
| Maximum QTcB change from screening, 30–60 ms | 381                             | 116 attributable events per 1000 treated, 265 (112–418)      | <b>RR = 3.29 (1.92–5.63), NNT = 4 (2–9)</b>             | <b>249 (1 RCT) [68]</b>       | <b>Very low</b> | <b>Favors placebo</b> |
| Maximum QTcB change from screening, > 60 ms  | 119                             | 14 attributable events per 1000 treated, 105 (5–204)         | <b>RR = 8.21 (2.04–33.06), NNT = 10 (5–190)</b>         | <b>249 (1 RCT) [68]</b>       | <b>Very low</b> | <b>Favors placebo</b> |
| Maximum QTcF change from screening, 30–60 ms | 95                              | 116                                                          | RR = 0.82 (0.30–2.24)                                   | 249 (1 RCT) [68]              | Very low        | No difference         |
| Maximum QTcF change from screening, > 60 ms  | 24                              | 14                                                           | RR = 1.64 (0.18–15.41)                                  | 249 (1 RCT) [68]              | Very low        | No difference         |
| <b>Absolute QTcB interval, &gt; 440 ms</b>   | <b>190</b>                      | <b>19 attributable events per 1000 treated, 171 (51–291)</b> | <b>RR = 9.86 (3.11–31.24), NNT = 6 (3–20)</b>           | <b>249 (1 RCT) [68]</b>       | <b>Very low</b> | <b>Favors placebo</b> |
| Absolute QTcB interval, > 450 ms             | 48                              | 14                                                           | RR = 3.29 (0.57–19.06)                                  | 249 (1 RCT) [68]              | Very low        | No difference         |
| Absolute QTcB interval, > 480 ms             | 24                              | 0                                                            | RR = 14.51 (0.60–350.26)                                | 249 (1 RCT) [68]              | Very low        | No difference         |

Population: children with depression or obsessive-compulsive disorder; Settings: any; Intervention: imipramine; Comparator: placebo or no active drug. **Boldface** indicates statistically significant differences at 95% CI. <sup>†</sup>We concluded that there is no difference in outcomes between active and control interventions based on p-value > 0.05 and inability to reject null hypotheses but without post hoc analysis of the statistical power to detect true differences.

Supplementary Table XI. GRADE summary of findings: effect of tricyclic antidepressants on QT interval in adults with mental disorders

| Outcome                                      | Risk with intervention per 1000 | Risk with comparator per 1000 | Relative measure of association        | No. of participants (studies)            | Quality (GRADE) | Comments <sup>†</sup>     |
|----------------------------------------------|---------------------------------|-------------------------------|----------------------------------------|------------------------------------------|-----------------|---------------------------|
| Clomipramine:                                |                                 |                               |                                        |                                          |                 |                           |
| Sudden death, with cardiovascular disease    | NR                              | NR                            | Adjusted OR = 1.85 (0.11–30.20)        | 4040 (1 observational study) [76]        | Low             | No difference             |
| Sudden death, without cardiovascular disease | NR                              | NR                            | Adjusted OR = 1.64 (0.16–17.24)        | 4040 (1 observational study) [76]        | Low             | No difference             |
| Dosulepin:                                   |                                 |                               |                                        |                                          |                 |                           |
| Sudden death, with cardiovascular disease    | NR                              | NR                            | Adjusted OR = 2.11 (0.92–4.84)         | 4040 (1 observational study) [76]        | Low             | No difference             |
| Sudden death, without cardiovascular disease | NR                              | NR                            | Adjusted OR = 1.65 (0.49–5.54)         | 4040 (1 observational study) [76]        | Low             | No difference             |
| Fluvoxamine:                                 |                                 |                               |                                        |                                          |                 |                           |
| <b>QTC [ms]</b>                              | <b>NR</b>                       | <b>NR</b>                     | <b>MD = -5.00 (-6.04 – -3.96)</b>      | <b>27 (1 RCT) [94, 149]</b>              | <b>Very low</b> | <b>Favors fluvoxamine</b> |
| Mirtazapine:                                 |                                 |                               |                                        |                                          |                 |                           |
| QT prolongation                              | NR                              | NR                            | Adjusted MD = -0.13 (-0.29 – 0.03)     | 38,397 (1 observational study) [86]      | Low             | No difference             |
| Nortriptyline:                               |                                 |                               |                                        |                                          |                 |                           |
| QT prolongation                              | NR                              | NR                            | Adjusted MD = 0.04 (-0.04 – 0.12)      | 38,397 (1 observational study) [86]      | Low             | No difference             |
| <b>Sudden cardiac arrest</b>                 | <b>NR</b>                       | <b>NR</b>                     | <b>Adjusted OR = 4.60 (1.20–18.40)</b> | <b>5298 (1 observational study) [85]</b> | <b>Low</b>      | <b>Favors control</b>     |

Population: adults with mental disorders; Settings: any; Intervention: tricyclic antidepressants; Comparator: placebo or no active drug. **Boldface** indicates statistically significant differences at 95% CI. <sup>†</sup>We concluded that there is no difference in outcomes between active and control interventions based on  $p$ -value > 0.05 and inability to reject null hypotheses but without post hoc analysis of the statistical power to detect true differences.
